# Supplementary material for: Triglycerides and Residual Atherosclerotic Risk
Source: PubMed Central journal article supplement — J Am Coll Cardiol. 2021 Jun 22;77(24):3031–41. doi: 10.1016/j.jacc.2021.04.059 (PMC8215641; doi:10.1016/j.jacc.2021.04.059), 2021-06-22

## ON-LINE MATERIAL

**eFigure 1. Study Population Flowchart.**

**eFigure 2. Interaction Between Cardiovascular Risk Factors and Triglycerides for the Prevalence of Subclinical Atherosclerosis.**

**eFigure 3. Prevalence and Extension of Coronary Artery Calcium (CAC) Score According to Triglyceride Levels.**

**eFigure 4. Association Between Coronary Artery Calcium (CAC) Score and Triglyceride Levels by Groups of Low-Density Lipoprotein Cholesterol.**

**eFigure 1. Study Population Flowchart.**

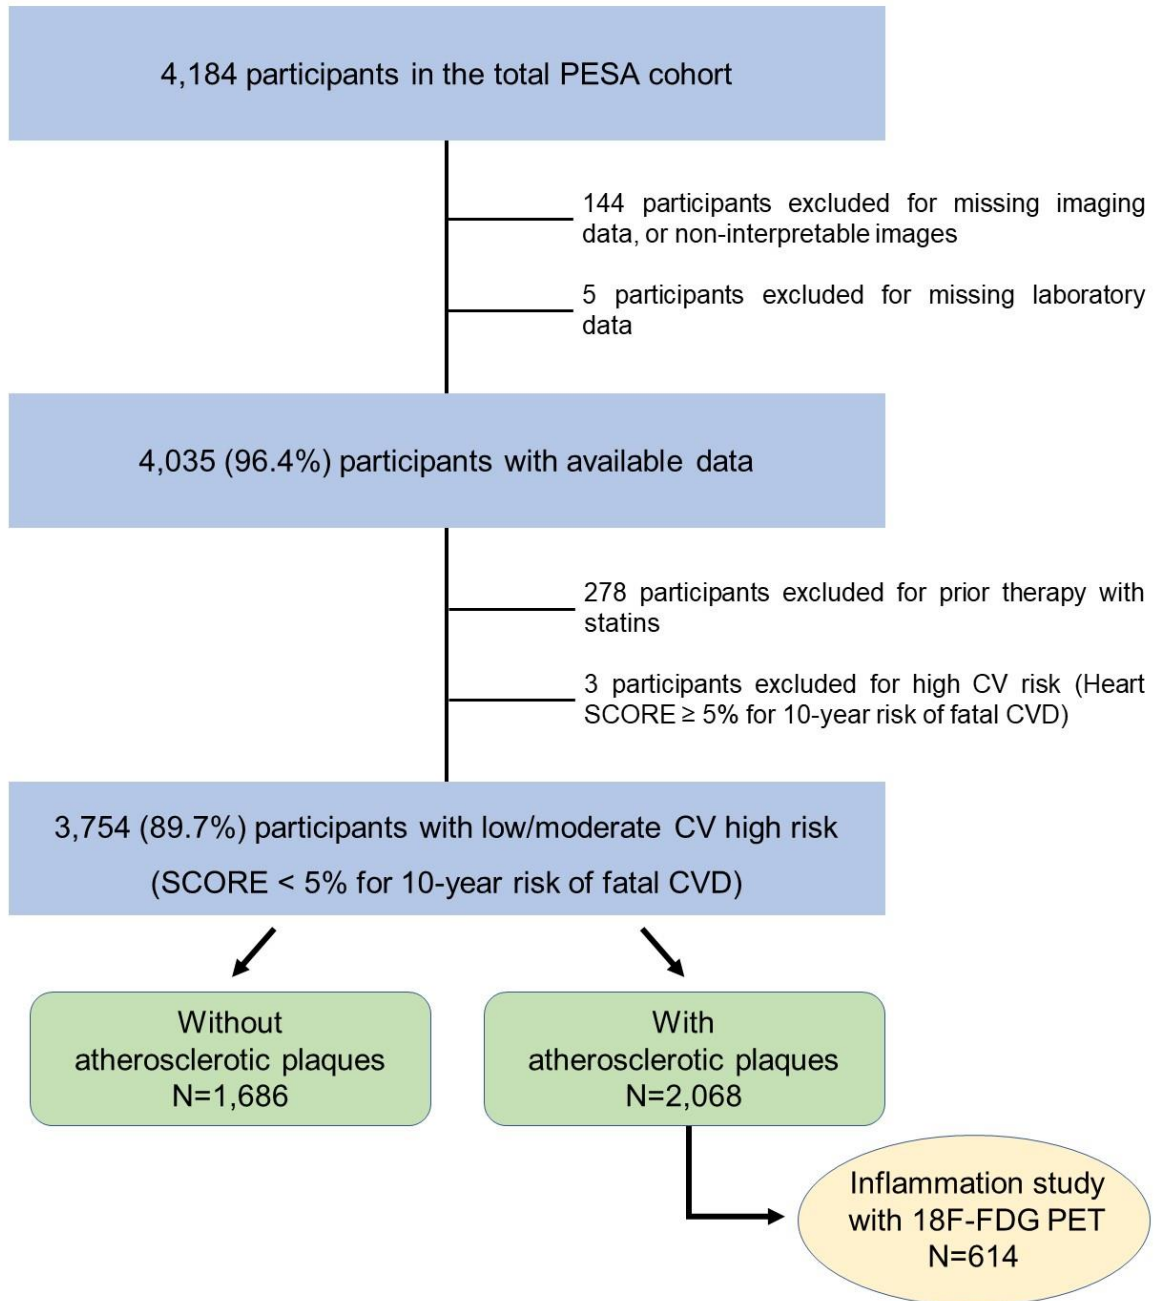

**eFigure 2. Interaction Between Cardiovascular Risk Factors and Triglycerides for the Prevalence of Subclinical Atherosclerosis.**

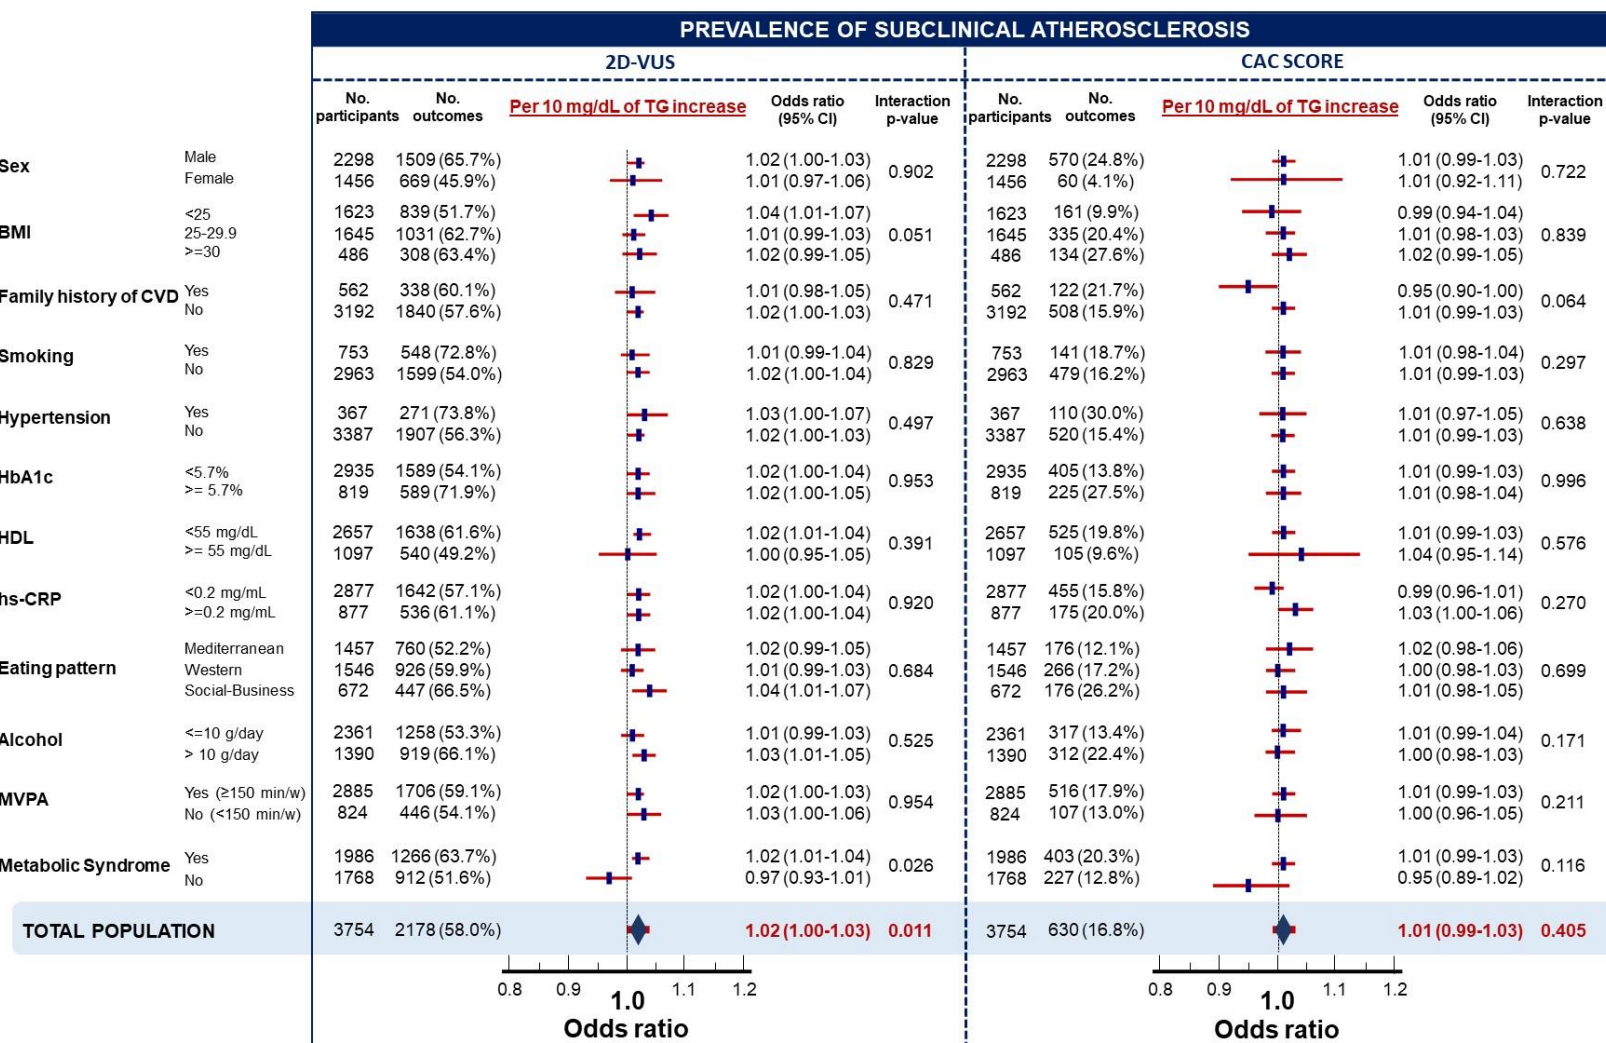

**eFigure 3. Prevalence and Extension of Coronary Artery Calcium (CAC) Score According to Triglyceride Levels.**

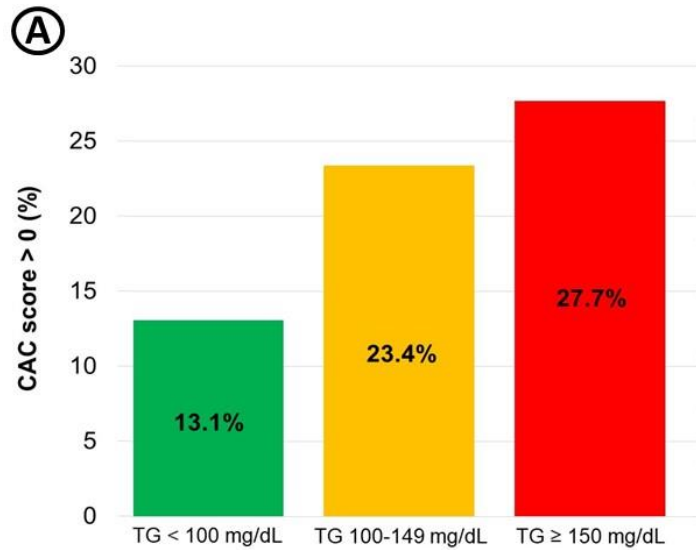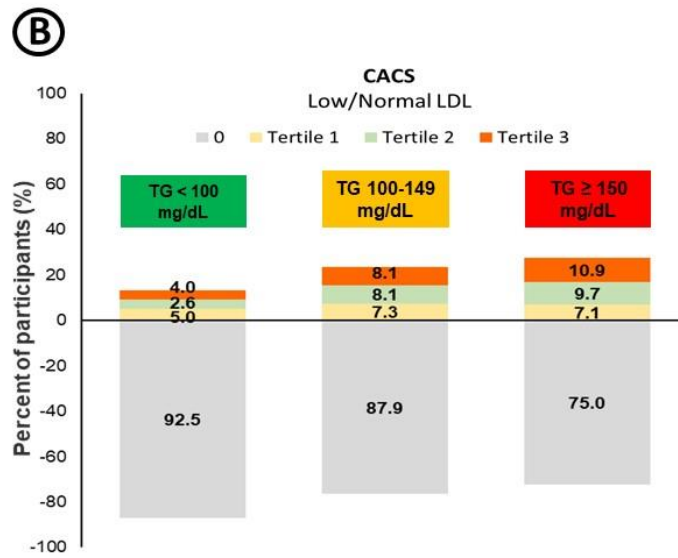

**(C)**

| CAC score > 0    |                  |              |                     |         |
|------------------|------------------|--------------|---------------------|---------|
| TG groups        | No. participants | No. outcomes | Odds ratio (95% CI) | p-value |
| TG < 100 mg/dL   | 2580             | 338          | Ref                 |         |
| TG 100-149 mg/dL | 781              | 183          | 1.00 (0.79-1.26)    | 0.974   |
| TG ≥ 150 mg/dL   | 393              | 109          | 1.11 (0.83-1.49)    | 0.467   |

0.5    1.0    2  
Odds ratio

**eFigure 4. Association Between Coronary Artery Calcium (CAC) Score and Triglyceride Levels by Groups of Low-Density Lipoprotein Cholesterol.**

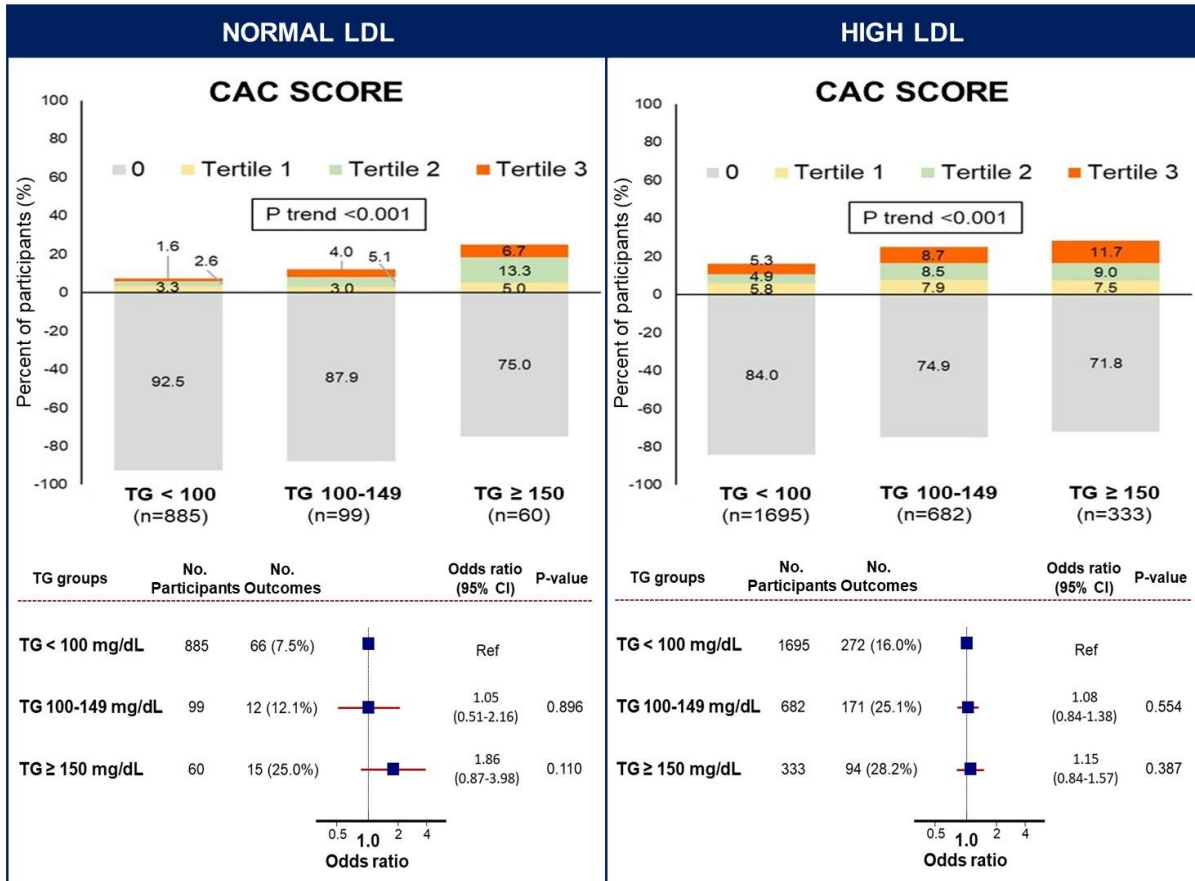

Supplement: mmc1.pdf [file mmc1.pdf]
